# Supplementary material for: Facile synthesis of iron-based compounds as high performance anode materials for Li-ion batteries
Source: Royal Society of Chemistry journal article supplement (doi:10.1039/c4ra06889k), 2014-08-14
Supplement: c4ra06889k1.pdf [file c4ra06889k1.pdf]

## Supporting Information

### Facile synthesis of iron-based compounds as high performance anode materials for Li-ion batteries

Keyan Li<sup>a</sup>, Hao Chen<sup>a</sup>, Fenfen Shua<sup>a</sup>, Dongfeng Xue<sup>a,b,\*</sup>, and Xinwen Guo<sup>a,\*</sup>

<sup>a</sup>School of Chemical Engineering, Dalian University of Technology, Dalian 116024, P.

R. China

<sup>b</sup>State Key Laboratory of Rare Earth Resource Utilization, Changchun Institute of Applied Chemistry, Chinese Academy of Sciences, Changchun 130022, P. R. China

\*Corresponding author. E-mail: dongfeng@ciac.ac.cn; guoxw@dlut.edu.cn

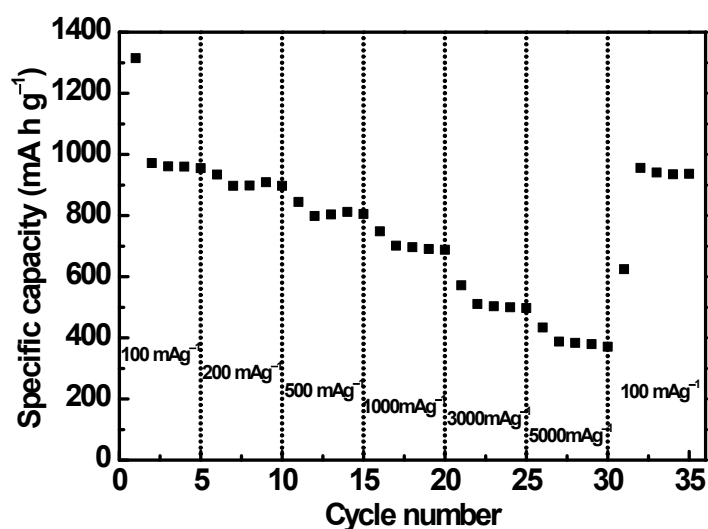

Fig. S1. Rate performance of  $\alpha$ -Fe<sub>2</sub>O<sub>3</sub>-N.

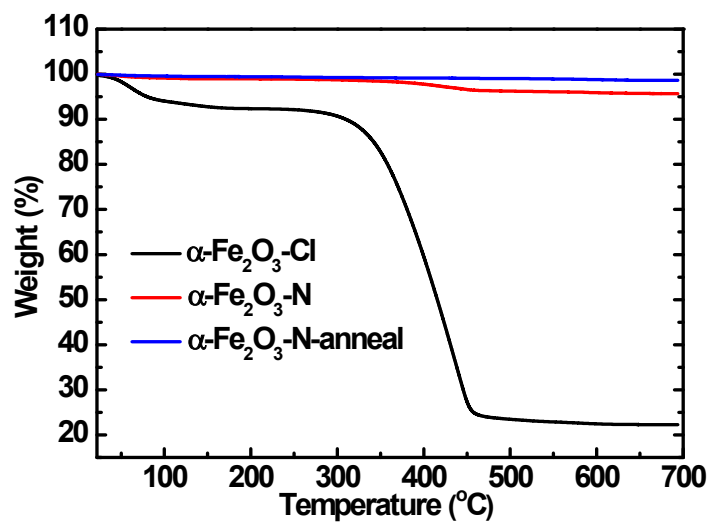

Fig. S2. TG curves of  $\alpha\text{-Fe}_2\text{O}_3\text{-Cl}$ ,  $\alpha\text{-Fe}_2\text{O}_3\text{-N}$  and  $\alpha\text{-Fe}_2\text{O}_3\text{-N-anneal}$ .

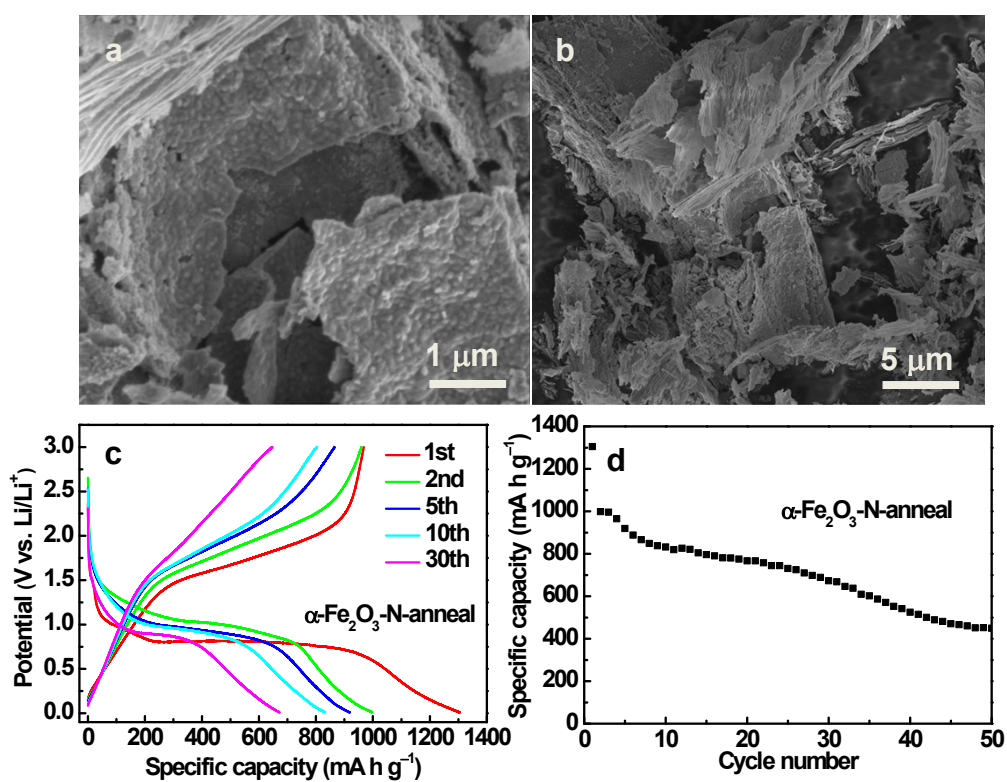

Fig. S3. FESEM images (a, b), charge/discharge voltage profiles (c) and cycling behaviour (d) of  $\alpha\text{-Fe}_2\text{O}_3\text{-N-anneal}$ .
